# Supplementary material
Source: PubMed Central journal article supplement (PMC8286298)
Supplement: NIHMS1677853-supplement-1.pdf [file NIHMS1677853-supplement-1.pdf]

Supplementary Fig. 1

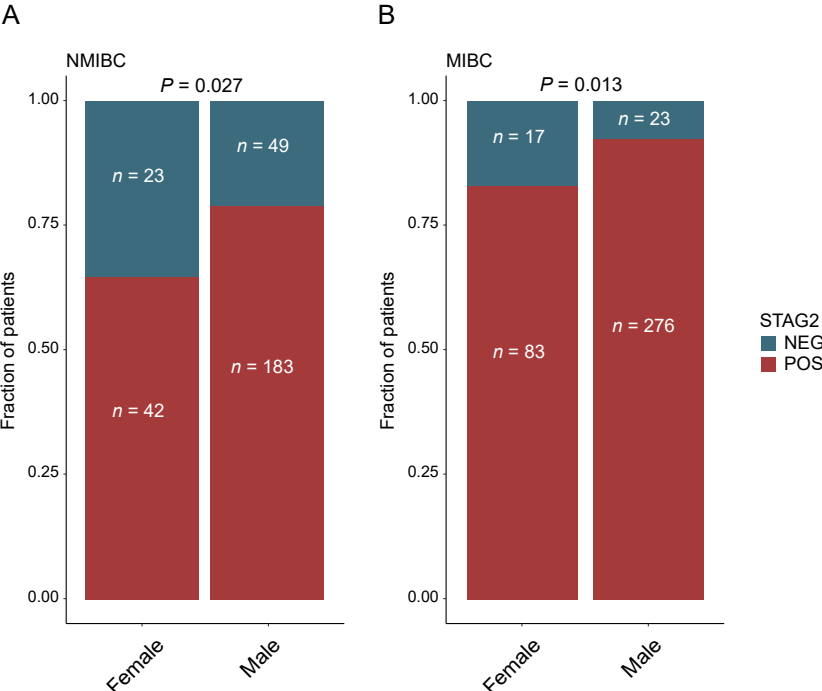

**Supplementary figure 1.** Frequency of maintenance (red) and loss (blue) of STAG2 expression in females and males in the NMIBC (A) and MIBC (B) cohort.

Supplementary fig. 2

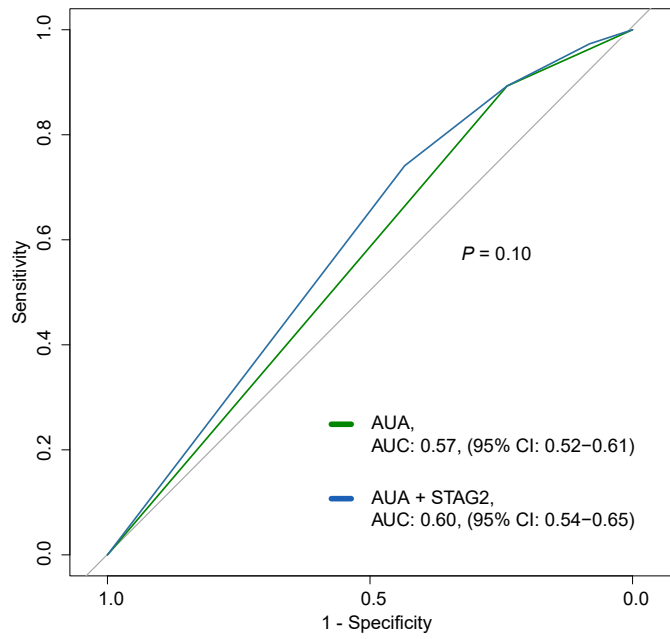

**Supplementary figure 2. STAG2 expression and American Urological Association risk stratification (AUA).** Receiver operating characteristics (ROC) curve for predicting progression using logistic regression models in NMIBC risk groups based on AUA guidelines.
